# Supplementary material for: Soluble markers of B cell activation suggest a role of B cells in the pathogenesis of systemic sclerosis-associated pulmonary arterial hypertension
Source: PubMed Central journal article supplement (PMC9374103; doi:10.3389/fimmu.2022.954007), 2022-07-29
Supplement: DataSheet_1.pdf [file DataSheet_1.pdf]

**Supplemental Table 1. Conditions associated with RF positivity in the 44 RF-positive SSc patients from the discovery cohort.**

|                                             | <b>N</b> | <b>Value</b> |
|---------------------------------------------|----------|--------------|
| <b>Immunologic diseases</b>                 |          |              |
| Diffuse cutaneous SSc, n (%)                | 44       | 29 (66%)     |
| Overlap syndrome, n (%)                     | 43       | 19 (44%)     |
| Sjogren's syndrome, n (%)                   | 43       | 9 (21%)      |
| Systemic <i>lupus erythematosus</i> , n (%) | 43       | 4 (9%)       |
| Inflammatory myopathy, n (%)                | 43       | 4 (9%)       |
| Rheumatoid arthritis, n (%)                 | 43       | 2 (5%)       |
| <b>Infectious diseases</b>                  |          |              |
| Hepatitis C, n (%)                          | 19       | 0 (0%)       |
| Hepatitis B, n (%)                          | 20       | 0 (0%)       |
| <b>Hematologic diseases</b>                 |          |              |
| Lymphoma, n (%)                             | 44       | 0 (0%)       |

RF: rheumatoid factor; SSc: systemic sclerosis.

**Supplemental Table 2. Detailed characteristics of SSc patients treated by rituximab in the discovery cohort.**

| <b>Patient</b> | <b>Age</b> | <b>SSc subset</b> | <b>ILD</b>       | <b>PH</b> | <b>RTX regimen</b>                                                                                 | <b>RTX indication</b>     | <b>Months since last RTX infusion</b> |
|----------------|------------|-------------------|------------------|-----------|----------------------------------------------------------------------------------------------------|---------------------------|---------------------------------------|
| #1             | 62         | lcSSc             | extensive<br>ILD | no        | 2 doses of 1g (D1 and D15)                                                                         | progressive ILD           | 2                                     |
| #2             | 27         | dcSSc             | extensive<br>ILD | no        | 2 doses of 1g (D1 and D15)<br>followed by 4 doses of 500 mg<br>(1 dose every 6 months for 2 years) | progressive ILD           | 3                                     |
| #3             | 55         | lcSSc             | extensive<br>ILD | no        | 2 doses of 1g (D1 and D15)<br>followed by 1 dose of 500 mg                                         | progressive ILD           | 9                                     |
| #4             | 46         | lcSSc             | extensive<br>ILD | no        | 2 doses of 1g (D1 and D15)                                                                         | joint involvement         | 13                                    |
| #5             | 83         | dcSSc             | limited<br>ILD   | no        | 2 doses of 1g (D1 and D15)                                                                         | progressive skin fibrosis | 32                                    |
| #6             | 53         | dcSSc             | extensive<br>ILD | no        | 2 doses of 1g (D1 and D15)<br>followed by 1 dose of 500 mg                                         | progressive ILD           | 44                                    |
| #7             | 60         | dcSSc             | extensive<br>ILD | no        | 2 doses of 1g (D1 and D15)<br>followed by 1 dose of 500 mg                                         | progressive ILD           | 83                                    |

D: day; dc: diffuse cutaneous; ILD: interstitial lung disease; lc: limited cutaneous; PH: pulmonary hypertension; RTX: rituximab; SSc: systemic sclerosis.

**Supplemental Table 3. Serum levels of soluble markers of B cell activation in the SSc patients and healthy controls (discovery cohort), after exclusion of the 7 SSc patients treated by rituximab.**

| Biomarkers                                     | Healthy controls<br>(N=80) | SSc patients never<br>treated by RTX<br>(N=73) | Effect size <sup>1</sup> | <i>p</i> -values <sup>2</sup> | <i>p</i> -values<br>adjusted<br>for FDR <sup>3</sup> |
|------------------------------------------------|----------------------------|------------------------------------------------|--------------------------|-------------------------------|------------------------------------------------------|
| <b>Positive RF, n (%)</b>                      | 8 (10%)                    | 40 (55%)                                       | 12.1 (4.4 ; 33.1)        | <0.0001                       | <b>&lt;0.0001</b>                                    |
| <b>β2-microglobulin (mg/L), median (Q1;Q3)</b> | 1.55 (1.34 ; 1.74)         | 2.11 (1.80 ; 2.65)                             | 0.64 (0.37 ; 0.91)       | <0.0001                       | <b>&lt;0.0001</b>                                    |
| <b>IgA (g/L), median (Q1;Q3)</b>               | 1.82 (1.31 ; 2.45)         | 2.10 (1.67 ; 2.93)                             | 0.41 (0.09 ; 0.72)       | 0.01                          | <b>0.04</b>                                          |
| <b>IgG (g/L), median (Q1;Q3)</b>               | 9.30 (7.96 ; 10.31)        | 9.53 (8.34 ; 12.10)                            | 0.62 (0.31 ; 0.94)       | 0.0001                        | <b>0.0004</b>                                        |
| <b>IgM (g/L), median (Q1;Q3)</b>               | 0.81 (0.61 ; 1.20)         | 1.01 (0.62 ; 1.55)                             | 0.11 (-0.19 ; 0.40)      | 0.48                          | 0.55                                                 |
| <b>BAFF (pg/ml), median (Q1;Q3)</b>            | 534 (446 ; 624)            | 589 (453 ; 812)                                | -0.18 (-0.49 ; 0.12)     | 0.25                          | 0.38                                                 |
| <b>APRIL (pg/ml), median (Q1;Q3)</b>           | 1911 (1619 ; 2236)         | 1948 (1408 ; 2297)                             | -0.14 (-0.46 ; 0.18)     | 0.39                          | 0.53                                                 |
| <b>sBCMA (pg/ml), median (Q1;Q3)</b>           | 37344 (29070 ; 47014)      | 44570 (26488 ; 58982)                          | 0.37 (0.05 ; 0.69)       | 0.02                          | 0.05                                                 |
| <b>sTACI (pg/ml), median (Q1;Q3)</b>           | 3.79 (1.64 ; 7.18)         | 5.27 (2.14 ; 11.80)                            | 0.28 (-0.04 ; 0.60)      | 0.94                          | 0.94                                                 |
| <b>sCD21 (pg/ml), median (Q1;Q3)</b>           | 51516 (39990 ; 64006)      | 47551 (33477 ; 58844)                          | -0.13 (-0.44 ; 0.18)     | 0.41                          | 0.53                                                 |
| <b>sCD23 (pg/ml), median (Q1;Q3)</b>           | 1952 (1405 ; 3168)         | 1815 (1056 ; 3144)                             | -0.09 (-0.41 ; 0.22)     | 0.57                          | 0.61                                                 |
| <b>sCD25 (pg/ml), median (Q1;Q3)</b>           | 305 (246 ; 391)            | 321 (239 ; 564)                                | 0.24 (-0.08 ; 0.56)      | 0.15                          | 0.26                                                 |
| <b>sCD27 (pg/ml), median (Q1;Q3)</b>           | 4440 (3615 ; 5658)         | 4919 (4221 ; 7463)                             | 0.33 (0.02 ; 0.64)       | 0.04                          | 0.08                                                 |
| <b>CXCL13 (pg/ml), median (Q1;Q3)</b>          | 36.95 (24.46 ; 55.77)      | 81.69 (47.64 ; 120.0)                          | 1.06 (0.72 ; 1.39)       | <0.0001                       | <b>&lt;0.0001</b>                                    |

APRIL: a proliferation-inducing ligand; BAFF: B-cell-activating factor; BCMA: B-cell maturation antigen; CD: cluster of differentiation; CXCL13: C-X-C motif chemokine 13; FDR: false discovery rate; Ig: immunoglobulin; Q: quartile; RF: rheumatoid factor; RTX: rituximab; s: soluble; SSc: systemic sclerosis; TACI: transmembrane activator and CAML interactor.

Results are expressed as median (first quartile; third quartile) for quantitative biomarkers and as frequency (percentage) otherwise.

All analyses were adjusted for age and gender.

<sup>1</sup> For quantitative biomarkers, effect sizes were calculated on log transformed variables using the Cohen *d*. Absolute values of 0.20–0.49 represent a small change; values of 0.50–0.79 a medium change; and values of ≥ 0.80 a large change. For the binary biomarker, effect size is the odds ratio of the status for the risk of positive RF with the status control as reference value.

<sup>2</sup>  $p$ -values calculated on log-transformed variables for quantitative biomarkers.

<sup>3</sup>  $p$ -values corrected for multiplicity using the False Discovery Rate (FDR) method (Benjamini Hochberg procedure).

Supplemental Figure 1. Assessment of B cell purity.

**A**

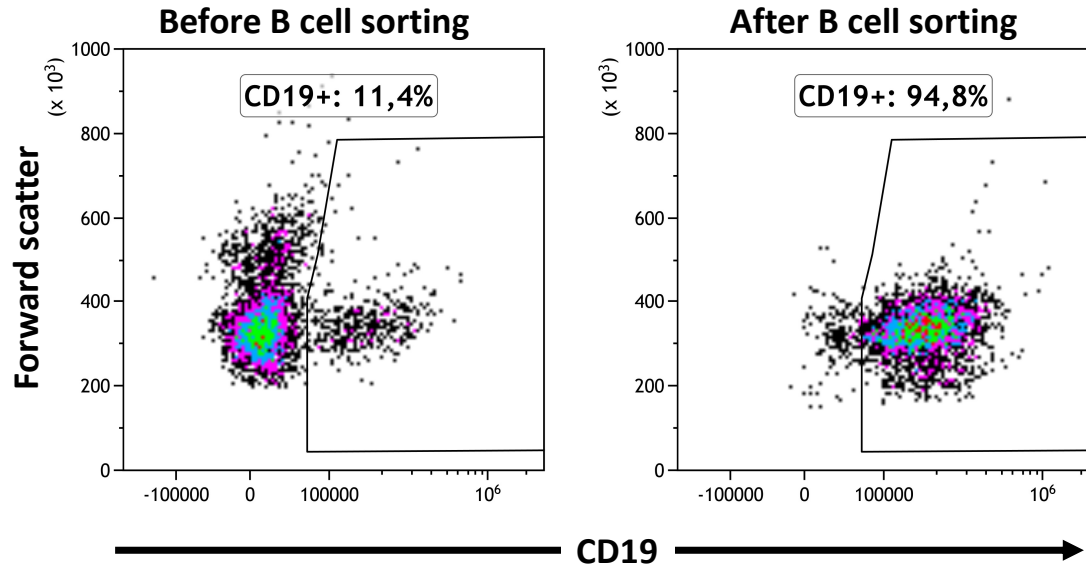

**B**

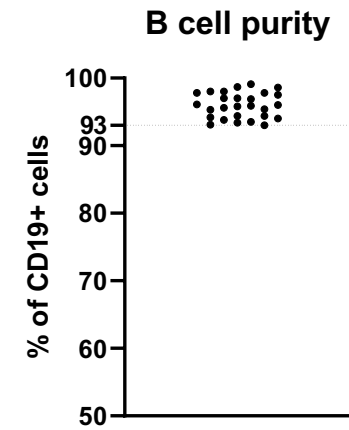

(A) For a representative sample of PBMCs, cytometry dot plots showing the proportion of CD19+ cells among PBMCs before B cell sorting and among the cell suspension obtained after B cell sorting. (B) Purity of sorted B cells assessed by cytometry as shown in (A).
